# Supplementary material
Source: Elsevier journal article supplement (https://www.sciencedirect.com/science/article/pii/S1517838217307992)
Supplement: mmc1 [file S1517838217307992:mmc1.docx]

Analysis of variance (ANOVA) of the all variable analyzed in nodules in cowpea plants inoculated *Bradyrhizobium* sp. (UFLA 03-84) or co-inoculated *Bradyrhizobium* sp. and *Actinomadura* sp. (UFLA 03-84 and 183-EL), *Bradyrhizobium* sp. and *Paenibacillus* *graminis* (UFLA 03-84 and MC 04.21), *Bradyrhizobium* sp. and *Bacillus* sp. (UFLA 03-84 and IPACC11) and *Bradyrhizobium* sp. and *Streptomyces* sp. (UFLA 03-84 and 212) in control and salt stress (50 mmol L-1 NaCl).

| Variable analyzed | Bacteria (B) | Salinity (S) | B  S | Treatment | Contrast | CVb |
| --- | --- | --- | --- | --- | --- | --- |
|  | Valor de F | | | | Aca  Inoculated | (%) |
| Height of shoots | 3.13 d | 4.05 d | 69.64 d | 19.41 d | 19.28 d | 19.36 |
| Dry weight of shoots | 1.97 ns | 68.43 d | 1.84 ns | 15.36 d | 69.91 d | 18.17 |
| Fresh weight of nodules | 1.61 ns | 104.13 d | 4.44 d | 14.26 d |  | 13.95 |
| Dry weight of nodules | 1.28 ns | 115.48 d | 3.69 c | 15.04 d |  | 14.81 |
| Number of nodules | 28.28 d | 3.58 ns | 1.11 ns | 13.46 d |  | 18.18 |
| Total nitrogen in shoot | 5.36 d | 11.90 d | 5.08 d | 29.81 d | 244.40 d | 9.79 |
| Total nitrogen in nodules | 3.20 c | 9.57 d | 0.33 ns | 2.63 d |  | 10.42 |
| Leghemoglobin | 4.68 d | 0.38 ns | 1.26 ns | 2.69 d |  | 15.51 |
| Free ammonia | 2.60 ns | 5.71 d | 0.57 ns | 2.05 d |  | 14.57 |
| Free amino acids | 2.60 ns | 5.71 c | 0.57 ns | 2.05 c |  | 14.57 |
| Ureides | 0.83 ns | 22.10 d | 1.59 ns | 3.53 d |  | 33.47 |
| Proline | 3.20 c | 30.59 d | 0.85 ns | 5.20 d |  | 39.18 |
| Soluble proteins | 12.72 d | 55.52 d | 6.45 d | 4.69 d |  | 7.90 |
| Sucrose | 4.03 c | 34.85 d | 6.84 d | 8.70 d |  | 18.52 |
| Total soluble sugars | 4.55 d | 41.94 d | 3.26 d | 8.13 d |  | 14.62 |
| Glutamine synthetase (GS) | 6.14 d | 109.04 d | 71.74 d | 46.72 d |  | 14.48 |
| Glutamate synthase (GOGAT) | 40.99 d | 0.03 ns | 1.45 ns | 18.87 d |  | 13.59 |
| Glutamate dehydrogenase aminating (GDH) | 9.45 d | 0.06 ns | 1.65 ns | 4.99 d |  | 19.59 |
| Activity of acid invertase | 63.84 d | 52.88 d | 18.64 d | 42.53 d |  | 7.87 |
| Activity of neutral invertase | 34.66 d | 147.77 d | 2.23 ns | 32.82 d |  | 4.52 |
|  | | | | | | |
|  | Bacteria (B) | Salinity (S) | B  S | Treatment |  | Total |
| Degree of freedom | 4 | 1 | 4 | 9 |  | 39 |

*p* ≥ 0.05(ns); 0.01 ≤ *p* < 0.05(c); *p* < 0.01(d).

aAbsolute control.

bVariation’s coefficient.
